# Supplementary material for: PNA-assembled graphene oxide for sensitive and selective detection of DNA
Source: Royal Society of Chemistry journal article supplement (doi:10.1039/c3an00266g), 2013-01-01
Supplement: c3an00266g.pdf [file c3an00266g.pdf]

## Electronic Supplementary Information (ESI)

# PNA-Assembled Graphene Oxide for Sensitive and Selective Detection of DNA

Shuang Guo, Danxin Du, Lina Tang, Yong Ning, Qunfeng Yao\* and Guo-Jun Zhang\*

### Characterization of GO

Raman spectrum was performed to confirm the successful formation of GO sheet. As shown in Fig. S1, two main Raman peaks reflected the characteristics of GO. The G band at  $1602.8\text{ cm}^{-1}$  was assigned to the vibration of  $\text{sp}^2$  bonded carbon atoms, and another strong Raman peak at  $1343.2\text{ cm}^{-1}$  (D band) assigned to the vibration of carbon atoms with dangling bonds in plane terminations of disordered graphite, indicating the formation of  $\text{sp}^3$  carbon in GO. As the Raman spectra agreed with what was discussed in a previous report,<sup>1</sup> we would judge that the GO was successfully synthesized. The chemical structure of it was further examined by FT-IR spectroscopy (Fig. S2). Several characteristic peaks of GO were observed in the FT-IR spectrum, including a broad and intense peak of the O-H group at  $3395.6\text{ cm}^{-1}$ , a C=O peak at  $1728.7\text{ cm}^{-1}$ , a C-OH stretching peak at  $1225.2\text{ cm}^{-1}$ , a C-O stretching peak at  $1044.7\text{ cm}^{-1}$ , while the peak at  $1624.3\text{ cm}^{-1}$  attributed to the vibration of the unoxidized graphene skeleton C=C and the absorbed water molecules.

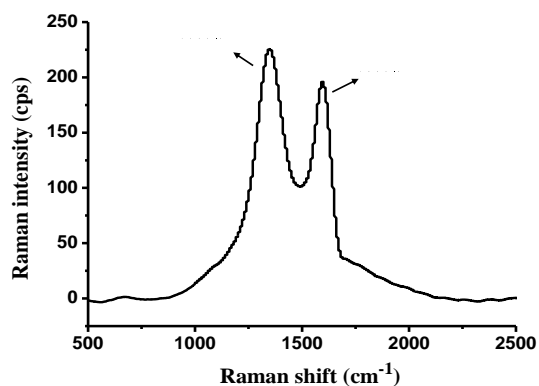

Fig. S1 Raman spectrum of GO.

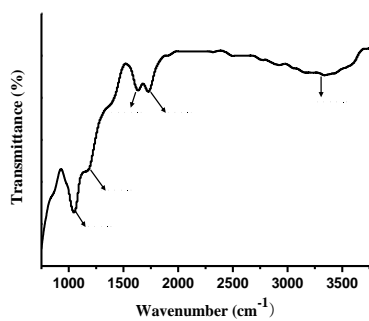

**Fig. S2** FT-IR spectrum of GO

### References

- 1 H. Dong, W. Gao, F. Yan, H. Ji and H. Ju, *Anal. Chem.*, 2010, **82**, 5511-5517.
- 2 Y. Xu, H. Bai, G. Lu, C. Li and G. Shi, *J. Am. Chem. Soc.*, 2008, **130**, 5856-5857.
